# Supplementary material for: Diallyl trisulfide ameliorates bone loss and alters specific gut microbiota and serum metabolites in natural aging mice
Source: Royal Society of Chemistry journal article supplement (doi:10.1039/d3fo01840g), 2023-01-01

## Supporting Information

### **Diallyl Trisulfide ameliorates bone loss and alters specific gut microbiota and serum metabolite in natural aging mice**

Feng Zhang<sup>†a</sup>, Jia Xu<sup>†a</sup>, Yanzhou Hu<sup>a</sup>, Jingjing Fang<sup>a</sup>, Minglan Yang<sup>d</sup>, Kunlun Huang<sup>a,b</sup>, Wentao Xu<sup>b,c</sup>, Xiaoyun He<sup>\*a,b</sup>

a. Key Laboratory of Precision Nutrition and Food Quality, Key Laboratory of Functional Dairy, Ministry of Education; College of Food Science and Nutritional Engineering; China Agricultural University, Beijing 100083, China. E-mail: hexiaoyun@cau.edu.cn.

b. Key Laboratory of Safety Assessment of Genetically Modified Organism (Food Safety), the Ministry of Agriculture and Rural Affairs of the P.R. China, Beijing, 100083, China

c. Department of Nutrition and Health, China Agricultural University, Beijing 100191, China

d. Department of Clinical Nutrition, West China Hospital, Sichuan University, Chengdu 610041, China

† Authors of the equal contribution.

### **Supplementary Method**

#### Serum biochemical analysis

Alanine aminotransferase (ALT), aspartate aminotransferase (AST) total protein (TP), uric acid (UA), creatinine (CREA), blood urea nitrogen (BUN) and Alkaline phosphatase (ALP) in serum were determined using an automatic biochemical analyzer (Hitachi, 7600-020, Tokyo, Japan).

### **Supplementary Figure**

**Fig. S1. Effect of DATS on serum biochemical index**  
**(A) liver function index(B) kidney function index (C)ALP level \*p < 0.05**

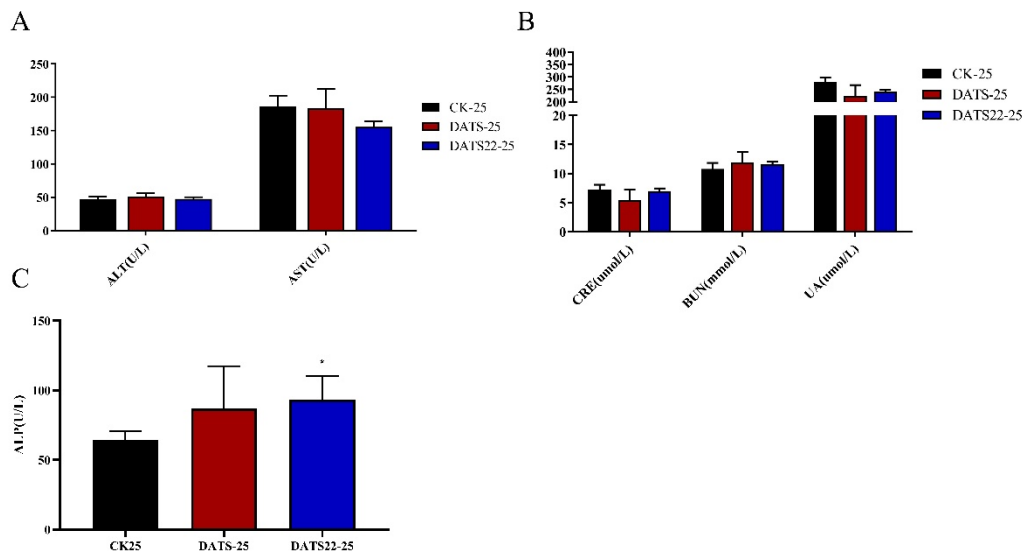

Supplement: d3fo01840g1.pdf [file d3fo01840g1.pdf]
